# Supplementary material for: A dynamic analysis of financing conditions for renewable energy technologies
Source: Springer Nature journal article supplement (doi:10.1038/s41560-018-0277-y), 2018-10-29
Supplement: 41560_2018_277_MOESM1_ESM.pdf [file 41560_2018_277_MOESM1_ESM.pdf]

In the format provided by the authors and unedited.

# A dynamic analysis of financing conditions for renewable energy technologies

Florian Egli \*, Bjarne Steffen \* and Tobias S. Schmidt \*

---

Energy Politics Group, Department of Humanities, Social and Political Sciences, ETH Zurich, Zürich, Switzerland. \*e-mail: [florian.egli@gess.ethz.ch](mailto:florian.egli@gess.ethz.ch); [bjarne.steffen@gess.ethz.ch](mailto:bjarne.steffen@gess.ethz.ch); [tobiasschmidt@ethz.ch](mailto:tobiasschmidt@ethz.ch)

## Supplementary Information

### *Supplementary Note 1: Key terms of project finance*

In project finance, each project is a separate legal entity, set up for the project's lifetime, often called a special purpose vehicle (SPV). The project sponsors hold equity in the SPV, and banks typically provide loans (i.e., debt) to the SPV. In this paper, we call both project sponsors and banks *investors*. The expected returns to project sponsors are called *cost of equity*, and the interest to be paid on the loans is called *cost of debt*. The relative shares of debt and equity in a project define the leverage or capital structure of the SPV. Loan providers usually have no recourse beyond the project, which means the project's risk profile translates directly to the cost of debt. Consequently, the cash flows generated by the SPV must cover operating costs and the debt service (i.e., capital repayment and interest)<sup>1</sup>. Any remaining cash flows go to the project sponsors and constitute their return on the investment. Therefore, equity investors also are concerned about a project's ability to service outstanding debt. The common metric to assess debt service is the debt service coverage ratio (DSCR), which serves as a direct measure of project risk (see Supplementary Table 1). Moreover, the SPV's capital structure usually also is an indication of project risk because more debt increases the debt service (just as a higher cost of debt does). As per convention, we analyse the financing conditions of SPVs at the beginning of projects, i.e., the point when investors make their investment decisions. Contrary to corporate finance, project finance directly ties the cost of capital to project risk<sup>1,2</sup> – providing a unique setting in which to study the dynamics of renewable energy financing conditions. Because project finance conditions are not quoted publicly, it is necessary to elicit data from renewable energy investment professionals.

Supplementary Figures

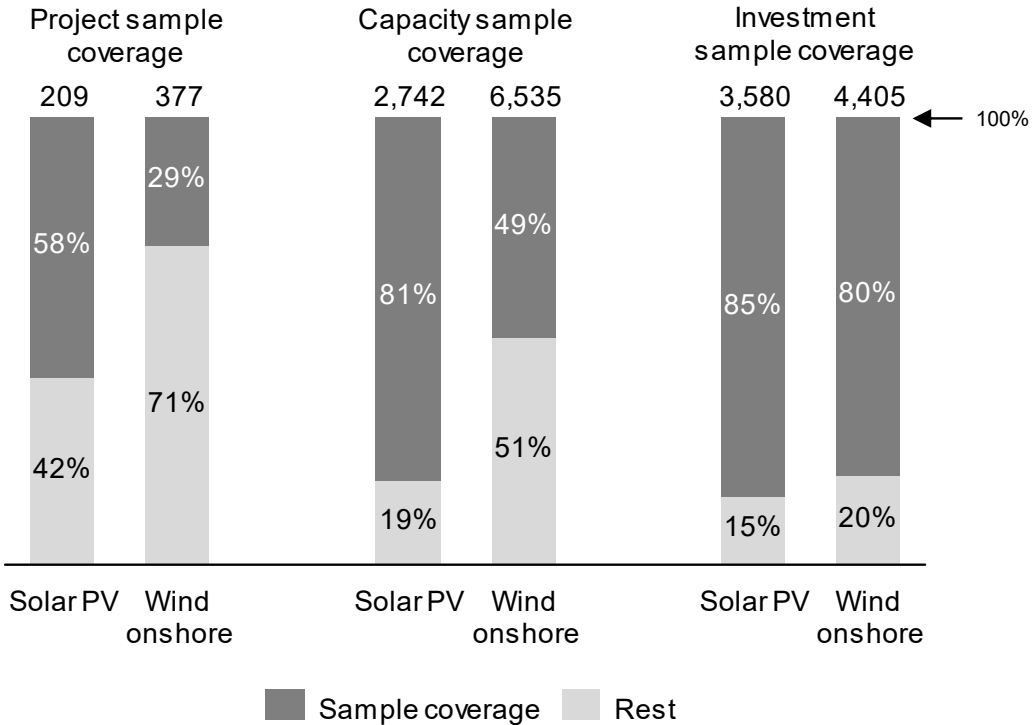

**Supplementary Figure 1:** Market share of our data providers. Sample coverage is shown with regards to all deals recorded in the BNEF asset database between 2000 and 2017. We calculate the sample coverage over the total of deals, where a lead debt arranger is specified. BNEF provides at least one lead debt arranger for 45% of solar PV investments and 42% of wind onshore investments.

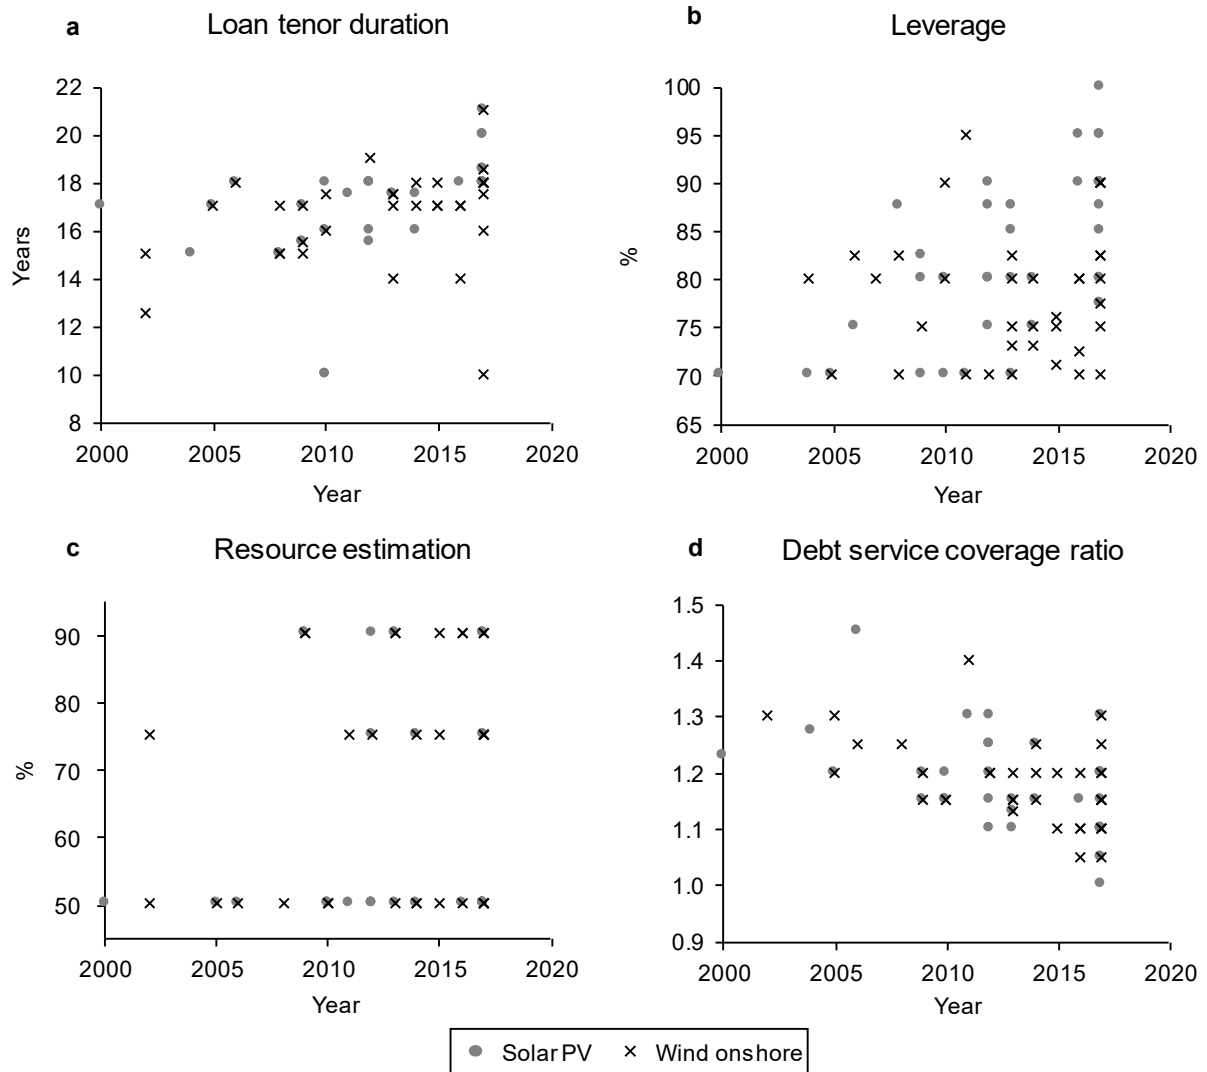

**Supplementary Figure 2:** Financial deal characteristics. **a**, Loan tenors (N = 70) increased over time. **b**, Leverage (N = 74) increased for solar PV and remained relatively constant for wind onshore. **c**, the resource estimation (percentile of the estimated distribution) has remained split between p50 (median) and p90 (risk-averse) for both technologies (N = 61). **d**, The debt service coverage ratio (N = 71) decreased for both technologies.

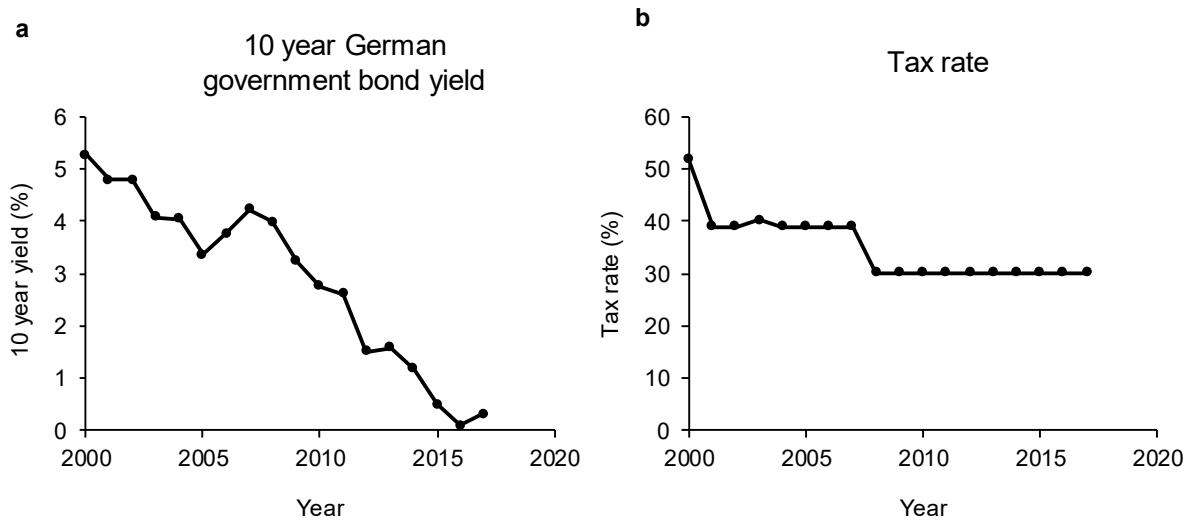

**Supplementary Figure 3:** Economic variables. Government bond yields decreased from over 5% to 0.31% over the period of our sample (a)<sup>3</sup>. The corporate tax rate has fallen from 52% to 30%, making debt comparatively more expensive (b)<sup>4</sup>.

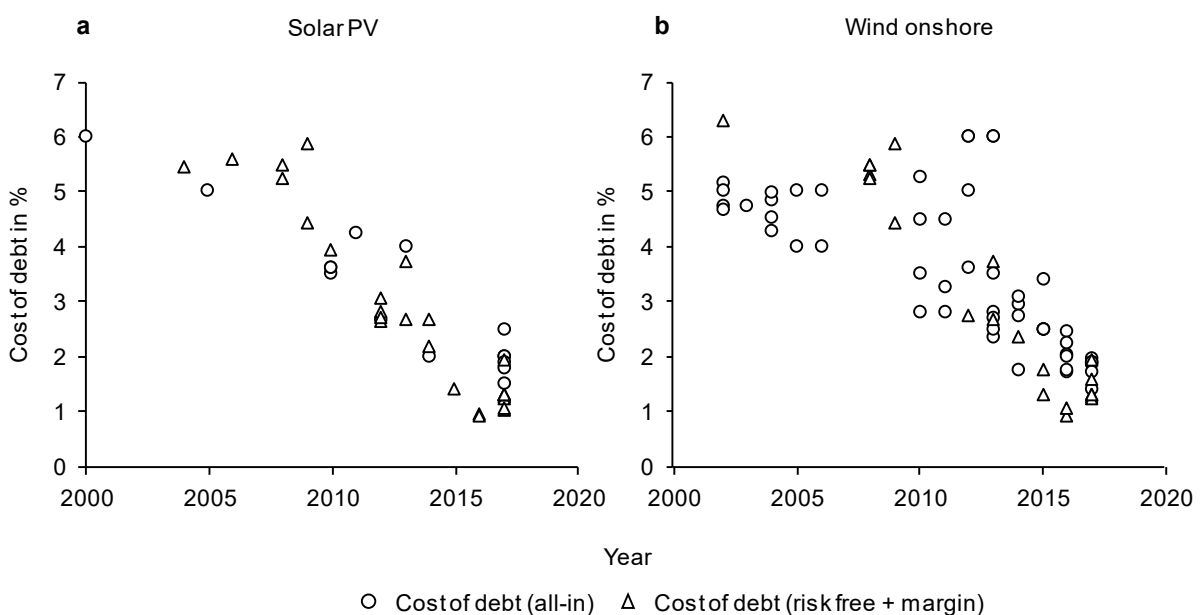

**Supplementary Figure 4:** Data validity check comparing the reported all-in cost of debt vs. 'synthetic' cost of debt resulting from reported debt margins adding the yield of a 10 year German government bond (risk free). **a**, Solar PV projects (N = 42), of which 15 all-in and 27 'synthetic'. **b**, Wind onshore projects (N = 73), of which 51 all-in and 22 'synthetic'.

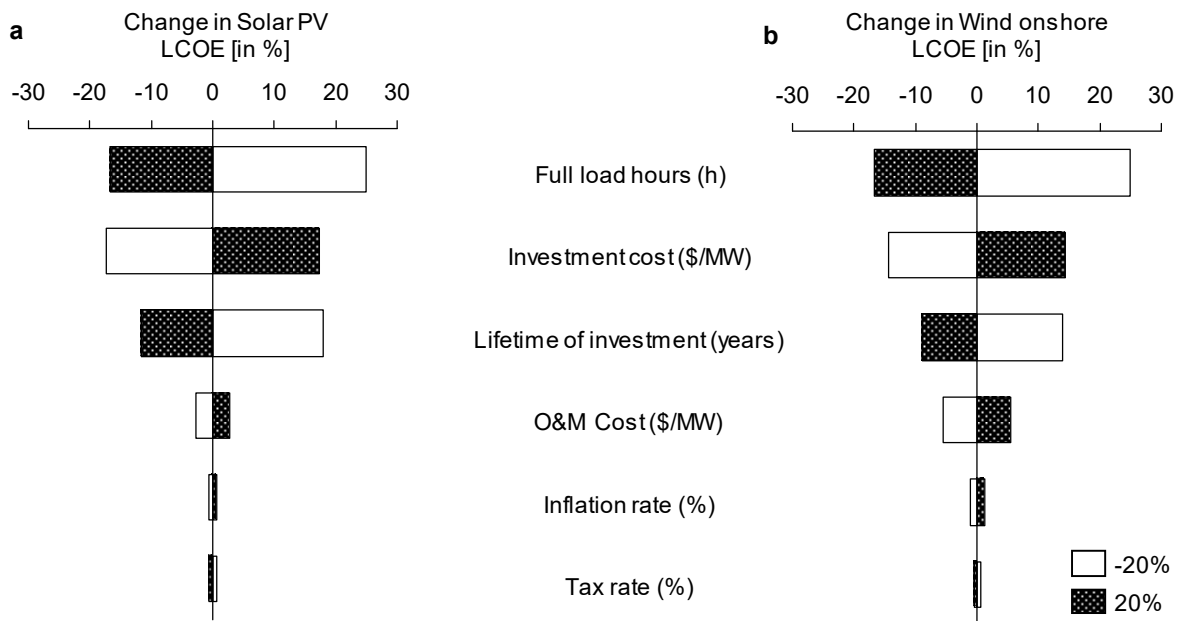

**Supplementary Figure 5:** LCOE sensitivity analysis for solar PV (a) and wind onshore (b). The figure depicts percent changes in the LCOE for both technologies given a +/- 20% change in one of the LCOE variables (all other variables stay remain constant). See Table 4 in the Supplementary Information for the values.

## Supplementary Tables

**Supplementary Table 1:** Definitions of financial terms.

| Term                               | Definition                                                                                                                                                                                                                                                                                                             |
|------------------------------------|------------------------------------------------------------------------------------------------------------------------------------------------------------------------------------------------------------------------------------------------------------------------------------------------------------------------|
| Capital expenditure (CAPEX)        | The initial expenditure (i.e. investment) into the RET generation asset.                                                                                                                                                                                                                                               |
| Cost of capital (CoC)              | The weighted average cost of capital (often denoted WACC) of a project, calculated according to Equation (2).                                                                                                                                                                                                          |
| Cost of debt                       | Interest payments on the debt raised to finance a project.                                                                                                                                                                                                                                                             |
| Cost of equity                     | Dividends payments (i.e. return) to project shareholders.                                                                                                                                                                                                                                                              |
| Debt margin                        | The project specific margin on top of the refinancing rate of the debt provider (e.g., bank).                                                                                                                                                                                                                          |
| Debt service coverage ratio (DSCR) | A measure of project cash flows available to pay debt obligations, namely the principal repayment and interest rate payments.                                                                                                                                                                                          |
| Financing conditions               | The wider financial conditions of a project including among others CoC, DSCR, and loan tenor.                                                                                                                                                                                                                          |
| Financing cost                     | The total cost of capital service, including debt service (i.e. principal repayment and interest rate payments) and returns to equity.                                                                                                                                                                                 |
| Investment cost                    | The initial investment cost of a RET generation. Used interchangeably with capital expenditure.                                                                                                                                                                                                                        |
| Leverage                           | The project capital structure, i.e. the share of debt of the total investment sum.                                                                                                                                                                                                                                     |
| Loan tenor                         | The time period for repayment of the loan.                                                                                                                                                                                                                                                                             |
| Operating expenditure (OPEX)       | Expenditures to operate the RET generation assets, occurring throughout the asset lifetime (if operated).                                                                                                                                                                                                              |
| P value                            | The percentile value of the distribution of solar irradiation or wind speed predictions used for project assessment. Calculating project returns on a p90 value means to take the 90 <sup>th</sup> percentile of the predicted distribution and represents a more conservative approach than for example p50 (median). |

**Supplementary Table 2:** Summary statistics. Counting all project where we have a value for at least one of the following variables: Cost of debt, cost of equity, leverage, cost of capital, loan tenor, and DSCR, our sample covers 48 solar PV and 85 wind onshore projects between 2000 and 2017 (N = 133). If we limit the sample to projects for which we have data on the cost of capital only (cost of debt, cost of equity or cost of capital), our sample includes 43 solar PV and 78 wind onshore projects (N = 121).

|                       | N   | Mean  | Std. Dev. | Min  | Max  |
|-----------------------|-----|-------|-----------|------|------|
| $K_D$                 | 112 | 3.18  | 1.57      | 0.89 | 6.28 |
| $K_E$                 | 66  | 7.07  | 2.13      | 3.25 | 14   |
| Leverage (debt share) | 74  | 80    | 7.75      | 70   | 100  |
| Debt margin           | 49  | 1.25  | 0.43      | 0.7  | 2.65 |
| Cost of capital       | 57  | 3.20  | 1.59      | 0.59 | 9.50 |
| Loan tenor            | 70  | 16.89 | 2.11      | 10   | 21   |
| DSCR                  | 71  | 1.18  | 0.08      | 1    | 1.45 |

**Supplementary Table 3: Full interview sample (N = 41)**

| <b>ID</b> | <b>Interview type</b> | <b>Current organisation</b> | <b>Current position</b>                                               | <b>Based in</b> | <b>RET investment experience (years)</b> | <b>Sex</b> | <b>Age range</b> |
|-----------|-----------------------|-----------------------------|-----------------------------------------------------------------------|-----------------|------------------------------------------|------------|------------------|
| 1         | Structured            | Debt provider               | Head of Division Energy & Utilities                                   | Germany         | 12                                       | M          | 25-45            |
| 2         | Structured            | Debt provider               | Vice President                                                        | Germany         | 28                                       | M          | 45-65            |
| 3         | Structured            | Debt provider               | Associate Director Project Finance & Capital Advisory                 | Germany         | 7                                        | M          | 25-45            |
| 4         | Structured            | Debt provider               | Associate Director Infrastructure & Power Project Finance             | Germany         | 9                                        | M          | 25-45            |
| 5         | Structured            | Debt provider               | Executive Director Project Finance Renewable Energies                 | Germany         | 21                                       | M          | 45-65            |
| 6         | Structured            | Debt provider               | Associate Director Global Infrastructure Debt                         | United Kingdom  | 5                                        | F          | 25-45            |
| 7         | Structured            | Debt provider               | Head Renewable Energies                                               | Germany         | 27                                       | M          | 45-65            |
| 8         | Structured            | Debt provider               | Project Finance Analyst                                               | Germany         | 11                                       | M          | 25-45            |
| 9         | Structured            | Debt provider               | Vice President Corporates & Small Business Project Finance            | Germany         | 11                                       | M          | 45-65            |
| 10        | Structured            | Debt provider               | Director Structured Finance Power & Renewables                        | The Netherlands | 11                                       | M          | 45-65            |
| 11        | Structured            | Debt provider               | Director Structured Finance Utilities, Power & Renewables             | The Netherlands | 11                                       | M          | 25-45            |
| 12        | Structured            | Debt provider               | Senior Manager Structured Finance Renewable Energy                    | Germany         | 19                                       | M          | 45-65            |
| 13        | Structured            | Debt provider               | Director Project & Structured Finance Utilities, Power and Renewables | Italy           | 11                                       | F          | 25-45            |
| 14        | Structured            | Debt provider               | Head of Renewable Energies                                            | The Netherlands | 19                                       | M          | 40-65            |
| 15        | Structured            | Debt provider               | Head of Project Finance Origination Renewable Energies                | Germany         | 23                                       | M          | 40-65            |
| 16        | Structured            | Debt provider               | Managing Director Project & Acquisition Finance                       | Germany         | 8                                        | M          | 45-65            |
| 17        | Structured            | Debt provider               | Equity                                                                | United Kingdom  | 12                                       | M          | 25-45            |
| 18        | Structured            | Equity provider*            | Head Risk Advisory                                                    | Germany         | 13                                       | M          | 45-65            |
| 19        | Structured            | Equity provider*            | CEO                                                                   | Germany         | 10                                       | M          | 45-65            |
| 20        | Structured            | Equity provider*            | Founder and CEO                                                       | Germany         | 5                                        | M          | 25-45            |
| 21        | Structured            | Equity provider             | Principal                                                             | Switzerland     | 5                                        | M          | 25-45            |
| 22        | Structured            | Equity provider             | Partner                                                               | Switzerland     | 9                                        | M          | 45-65            |
| 23        | Structured            | Equity provider             | Director Infrastructure Equity Investment Team                        | Germany         | 12                                       | M          | 45-65            |
| 24        | Structured            | Equity provider             | Vice President Renewables                                             | Switzerland     | 3                                        | M          | 25-45            |
| 25        | Structured            | Equity provider             | CIO                                                                   | Germany         | 2                                        | M          | 25-45            |
| 26        | Structured            | Equity provider             | CEO                                                                   | Germany         | 2                                        | M          | 25-45            |
| 27        | Structured            | Equity provider             | Associate Director Energy & Cleantech                                 | France          | 12                                       | M          | 25-45            |
| 28        | Structured            | Equity provider             | Associate                                                             | United Kingdom  | 18                                       | M          | 25-45            |
| 29        | Structured            | Public actor                | Head Energy Services                                                  | Switzerland     | 12                                       | M          | 25-45            |
| 30        | Structured            | Public actor                | Deputy Head Energy Management                                         | Switzerland     | 3                                        | M          | 25-45            |
| 31        | Structured            | Public actor                | CEO                                                                   | Switzerland     | 7                                        | M          | 45-65            |



|    |             |                           |                                                        |                |    |   |       |
|----|-------------|---------------------------|--------------------------------------------------------|----------------|----|---|-------|
| 32 | Structured  | Public actor              | Head Portfolio and Asset Management Renewable Energies | Switzerland    | 8  | M | 25-45 |
| 33 | Structured  | Public actor              | Vice President Origination and Structuring             | Germany        | 6  | M | 25-45 |
| 34 | Exploratory | Equity provider           | Founding Partner                                       | Switzerland    | 18 | F | 45-65 |
| 35 | Exploratory | Equity provider           | Investments Director                                   | United Kingdom | 12 | M | 25-45 |
| 36 | Exploratory | Equity provider*          | Head Risk Advisory                                     | Germany        | 13 | M | 45-65 |
| 37 | Exploratory | Equity provider           | Partner                                                | Switzerland    | 9  | M | 45-65 |
| 38 | Exploratory | Equity provider           | Principal                                              | Switzerland    | 5  | M | 25-45 |
| 39 | Exploratory | Other (former researcher) | Head Hybrid Power Solutions                            | Germany        | 12 | M | 25-45 |
| 40 | Exploratory | Public actor              | Senior Investment Manager                              | Norway         | 11 | M | 45-65 |
| 41 | Exploratory | Public actor              | Economist                                              | Luxemburg      | 15 | M | 25-45 |

\* = Acts as advisor for equity investors

Note: For age, only ranges given to protect anonymity of interviewees

**Supplementary Table 4: LCOE model parameters**

| <i>Parameters</i>                                                                             | <b>Solar PV</b> |       | <b>Wind onshore</b> |        |
|-----------------------------------------------------------------------------------------------|-----------------|-------|---------------------|--------|
|                                                                                               | 2000-05         | 2017  | 2000-05             | 2017   |
| Inflation                                                                                     | 2%              | 2%    | 2%                  | 2%     |
| Full load hours p.a. <sup>5,6</sup>                                                           | 1051            | 1051  | 1500                | 2716   |
| Investment cost US\$ MW <sup>-1</sup> (CAPEX) <sup>7</sup>                                    | 6.37m           | 1.05m | 1.60m               | 2.00m  |
| Operation and maintenance cost US\$ MW <sup>-1</sup> year <sup>-1</sup> (OPEX) <sup>6,8</sup> | 8'000           | 8'000 | 38'000              | 38'000 |
| Asset lifetime                                                                                | 20              | 20    | 20                  | 20     |
| Cost of capital                                                                               | 5.1%            | 1.6%  | 4.5%                | 1.9%   |

**Supplementary Table 5:** Solar PV experience rate estimation and robustness checks. All regressions are calculated using OLS with robust standard errors and all variables are in log. For each specification, we show a version without and a version with investor fixed effects. InvUNEP denotes the cumulative global investment data from UN Environment (columns 1 and 2), InvEU denotes cumulative European investment (columns 3 and 4), InvBNEFxIRENA denotes the alternative measure for cumulative global investment using data from BNEF on investment cost per MW and data from IRENA on capacity (columns 5 and 6). The resulting minimum and maximum experience rates are shown in Supplementary Table 7. For details on the variables, see Methods.

| VARIABLES              | Log(debt margin)      |                       |                      |                       |                       |                       | Log(dschr-1)          |                       |                      |                       |                       |                       | Log(loan tenor)      |                      |                     |                      |                      |                      |
|------------------------|-----------------------|-----------------------|----------------------|-----------------------|-----------------------|-----------------------|-----------------------|-----------------------|----------------------|-----------------------|-----------------------|-----------------------|----------------------|----------------------|---------------------|----------------------|----------------------|----------------------|
|                        | (1)                   | (2)                   | (3)                  | (4)                   | (5)                   | (6)                   | (1)                   | (2)                   | (3)                  | (4)                   | (5)                   | (6)                   | (1)                  | (2)                  | (3)                 | (4)                  | (5)                  | (6)                  |
| Log(InvUNEP)           | -0.162***<br>(0.0532) | -0.149***<br>(0.0362) |                      |                       |                       |                       | -0.209***<br>(0.0744) | -0.257***<br>(0.0638) |                      |                       |                       |                       | 0.0376**<br>(0.0170) | 0.0585**<br>(0.0224) |                     |                      |                      |                      |
| Log(InvEU)             |                       |                       | -0.155**<br>(0.0567) | -0.147***<br>(0.0451) |                       |                       |                       |                       | -0.186**<br>(0.0699) | -0.215***<br>(0.0543) |                       |                       |                      |                      | 0.0276*<br>(0.0152) | 0.0479**<br>(0.0200) |                      |                      |
| Log(InvBNEFxIRENA)     |                       |                       |                      |                       | -0.164***<br>(0.0511) | -0.151***<br>(0.0356) |                       |                       |                      |                       | -0.226***<br>(0.0759) | -0.273***<br>(0.0609) |                      |                      |                     |                      | 0.0403**<br>(0.0171) | 0.0623**<br>(0.0226) |
| Constant               | 1.194***<br>(0.350)   | 1.693***<br>(0.239)   | 2.042***<br>(0.690)  | 2.532***<br>(0.556)   | 1.162***<br>(0.322)   | 1.662***<br>(0.227)   | -0.588<br>(0.429)     | -0.206<br>(0.497)     | 0.335<br>(0.804)     | 0.746<br>(0.749)      | -0.539<br>(0.416)     | -0.163<br>(0.468)     | 2.598***<br>(0.117)  | 2.434***<br>(0.157)  | 2.501***<br>(0.187) | 2.231***<br>(0.256)  | 2.591***<br>(0.114)  | 2.423***<br>(0.152)  |
| Investor fixed effects | no                    | yes                   | no                   | yes                   | no                    | yes                   | no                    | yes                   | no                   | yes                   | no                    | yes                   | no                   | yes                  | no                  | yes                  | no                   | yes                  |
| Observations           | 27                    | 27                    | 27                   | 27                    | 27                    | 27                    | 35                    | 35                    | 35                   | 35                    | 35                    | 35                    | 36                   | 36                   | 36                  | 36                   | 36                   | 36                   |
| R-squared              | 0.287                 | 0.850                 | 0.204                | 0.801                 | 0.284                 | 0.847                 | 0.162                 | 0.696                 | 0.115                | 0.634                 | 0.167                 | 0.697                 | 0.104                | 0.398                | 0.050               | 0.319                | 0.107                | 0.402                |

Robust standard errors in parentheses

\*\*\* p<0.01, \*\* p<0.05, \* p<0.1

**Supplementary Table 6:** Wind onshore experience rate estimation and robustness checks. All regressions are calculated using OLS with robust standard errors and all variables are in log. For each specification, we show a version without and a version with investor fixed effects. InvUNEP denotes the cumulative global investment data from UN Environment (columns 1 and 2), InvEU denotes cumulative European investment (columns 3 and 4), InvBNEFxIRENA denotes the alternative measure for cumulative global investment using data from BNEF on investment cost per MW and data from IRENA on capacity (columns 5 and 6). The resulting minimum and maximum experience rates are shown in Supplementary Table 7. For details on the variables, see Methods.

| VARIABLES              | Log(debt margin)     |                       |                      |                       |                       |                       | Log(dscr-1)           |                       |                       |                     |                       |                       | Log(loan tenor)     |                      |                     |                     |                      |                     |                     |
|------------------------|----------------------|-----------------------|----------------------|-----------------------|-----------------------|-----------------------|-----------------------|-----------------------|-----------------------|---------------------|-----------------------|-----------------------|---------------------|----------------------|---------------------|---------------------|----------------------|---------------------|---------------------|
|                        | (1)                  | (2)                   | (3)                  | (4)                   | (5)                   | (6)                   | (1)                   | (2)                   | (3)                   | (4)                 | (5)                   | (6)                   | (1)                 | (2)                  | (3)                 | (4)                 | (5)                  | (6)                 |                     |
| Log(InvUNEP)           | -0.164**<br>(0.0633) | -0.162***<br>(0.0472) |                      |                       |                       |                       | -0.261***<br>(0.0594) | -0.283***<br>(0.0936) |                       |                     |                       |                       | 0.0430*<br>(0.0253) | 0.0532**<br>(0.0254) |                     |                     |                      |                     |                     |
| Log(InvEU)             |                      |                       | -0.254**<br>(0.0982) | -0.254***<br>(0.0750) |                       |                       |                       |                       | -0.423***<br>(0.0992) | -0.459**<br>(0.161) |                       |                       |                     |                      |                     | 0.0688*<br>(0.0401) | 0.0866**<br>(0.0377) |                     |                     |
| Log(InvBNEFxIRENA)     |                      |                       |                      |                       | -0.182***<br>(0.0638) | -0.178***<br>(0.0423) |                       |                       |                       |                     | -0.280***<br>(0.0646) | -0.310***<br>(0.0964) |                     |                      |                     |                     |                      | 0.0449<br>(0.0280)  | 0.0567*<br>(0.0288) |
| Constant               | 1.250***<br>(0.416)  | 1.789***<br>(0.317)   | 3.272**<br>(1.196)   | 3.819***<br>(0.910)   | 1.292***<br>(0.392)   | 1.816***<br>(0.264)   | -0.123<br>(0.344)     | -0.0273<br>(0.651)    | 3.315***<br>(1.161)   | 3.703*<br>(1.974)   | -0.118<br>(0.350)     | 0.0186<br>(0.628)     | 2.531***<br>(0.154) | 2.472***<br>(0.172)  | 1.976***<br>(0.474) | 1.769***<br>(0.464) | 2.538***<br>(0.159)  | 2.473***<br>(0.183) |                     |
| Investor fixed effects | no                   | yes                   | no                   | yes                   | no                    | yes                   | no                    | yes                   | no                    | yes                 | no                    | yes                   | no                  | yes                  | no                  | yes                 | no                   | yes                 |                     |
| Observations           | 22                   | 22                    | 22                   | 22                    | 22                    | 22                    | 36                    | 36                    | 36                    | 36                  | 36                    | 36                    | 34                  | 34                   | 34                  | 34                  | 34                   | 34                  |                     |
| R-squared              | 0.212                | 0.913                 | 0.209                | 0.915                 | 0.235                 | 0.925                 | 0.218                 | 0.636                 | 0.224                 | 0.645               | 0.222                 | 0.648                 | 0.089               | 0.746                | 0.091               | 0.753               | 0.083                | 0.743               |                     |

Robust standard errors in parentheses

\*\*\* p<0.01, \*\* p<0.05, \* p<0.1

**Supplementary Table 7:** Experience rate robustness checks. The table indicates minimum and maximum values for the experience rates across all model specifications shown in Supplementary Tables 5 and 6.

|             | <b>Solar PV</b> |     | <b>Wind onshore</b> |     |
|-------------|-----------------|-----|---------------------|-----|
|             | Min             | Max | Min                 | Max |
| Debt margin | 10%             | 11% | 11%                 | 16% |
| DSCR        | 12%             | 17% | 17%                 | 27% |
| Loan tenor  | -2%             | -4% | -3%                 | -6% |

### *Supplementary References*

1. Gatti, S. *Project finance in theory and practice : designing, structuring, and financing private and public projects*. (Academic Press, 2013).
2. Steffen, B. The importance of project finance for renewable energy projects. *Energy Econ.* **69**, 280–294 (2018).
3. European Central Bank. *Long-term interest rate statistics for EU Member States*. (2018).
4. OECD. *Statutory corporate income tax rate*. (2018).
5. Wirth, H. *Aktuelle Fakten zur Photovoltaik in Deutschland*. (2018).
6. Durstewitz, M. *et al. Windenergie Report Deutschland 2016*. (Fraunhofer Verlag, 2017).
7. BNEF. *Asset database. Bloomberg* (2017).
8. Bächler, M. *Technical Risk Management during O & M of PV Plants*. (2016).
